# Supplementary material for: Quantitative comparison of in vitro and in vivo embryogenesis at a single cell resolution
Source: bioRxiv or medRxiv preprint supplement (doi:10.1101/2021.05.07.443179), 2021-05-07

# Supplementary Figure 1

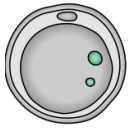

Zygote

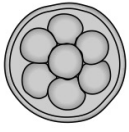

E2.5

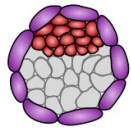

E3.5

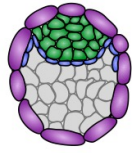

E4.5

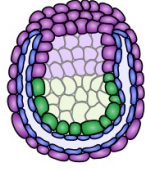

E5.5

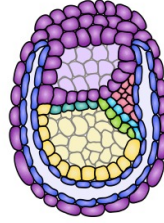

E6.5

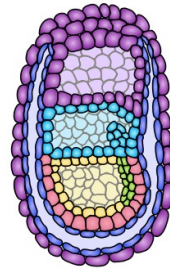

E7.5

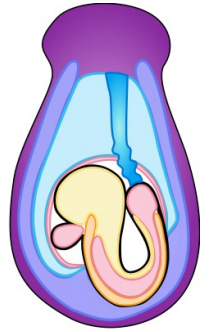

E8.5

# Supplementary Figure 2

A

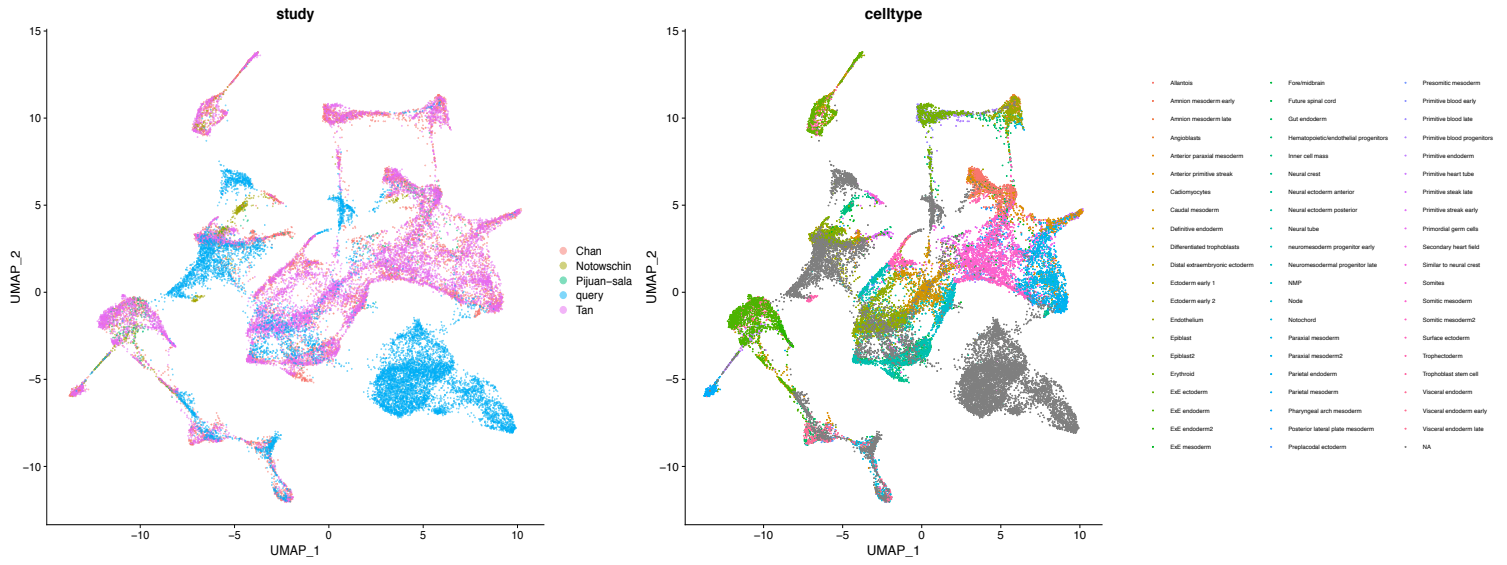

B

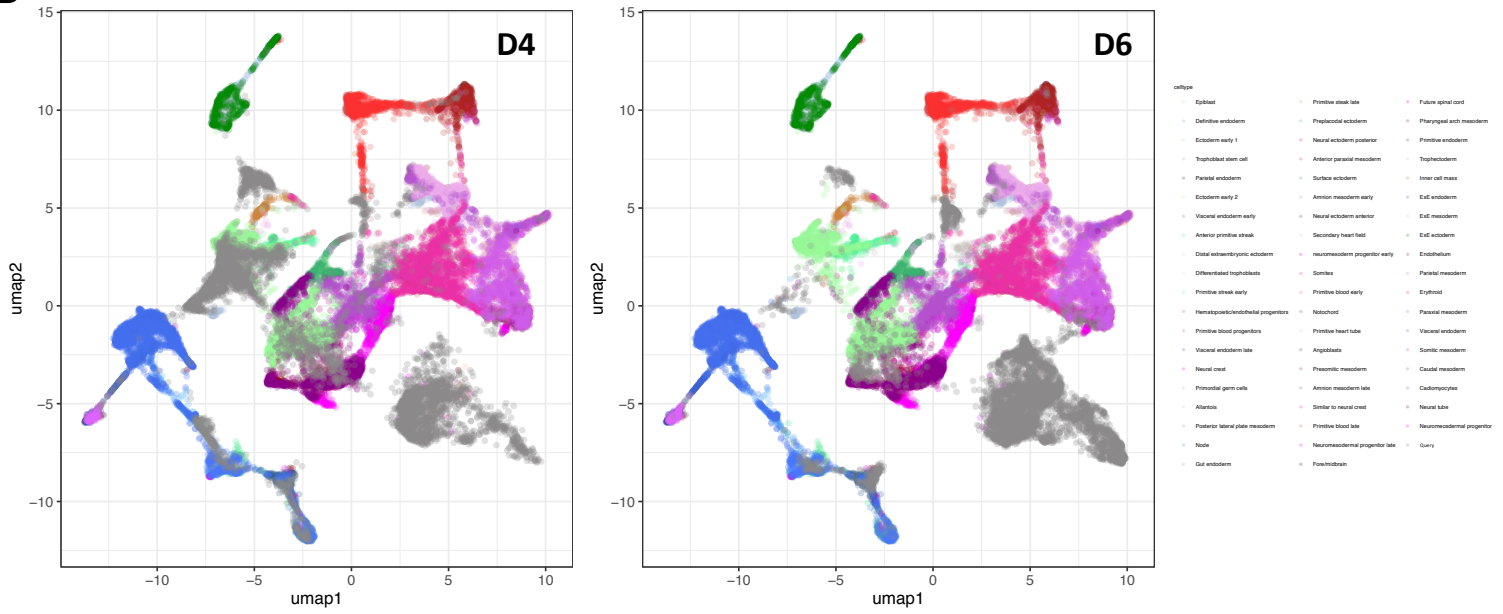

C

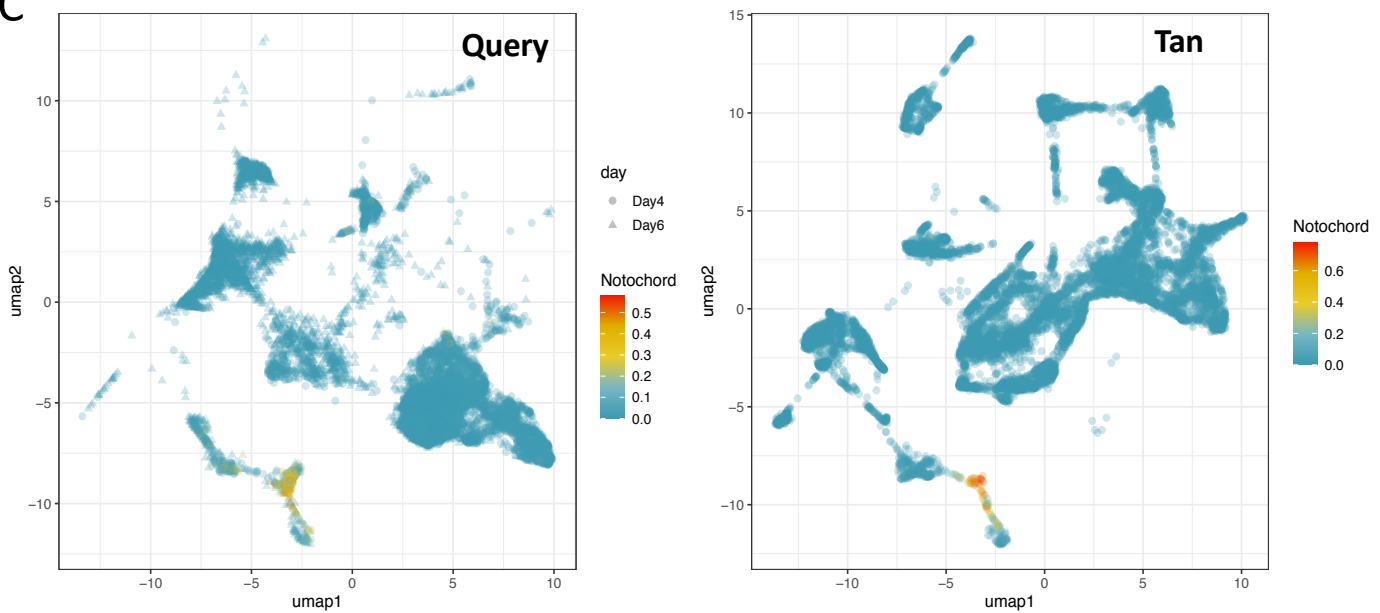

D

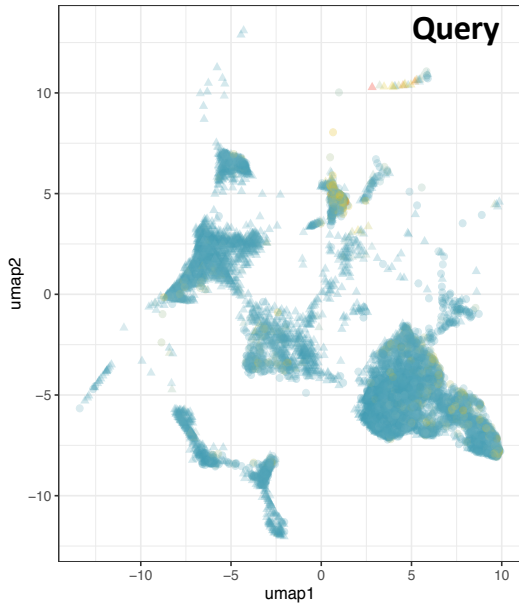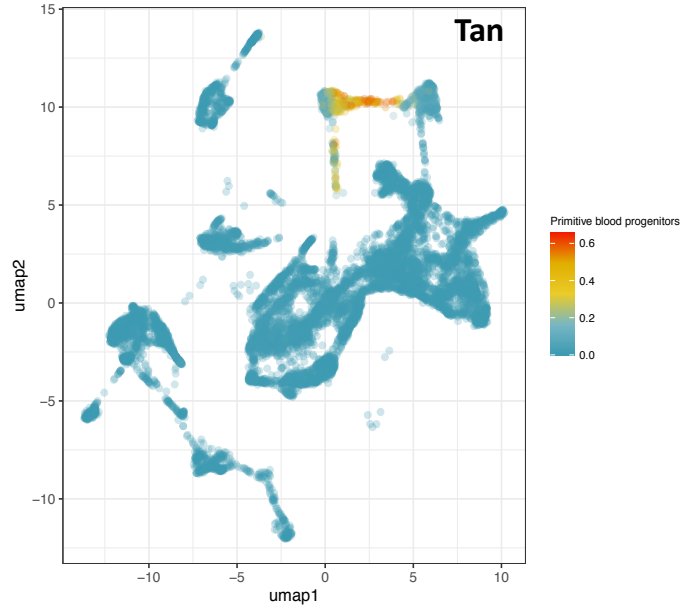

# Supplementary Figure 3

A

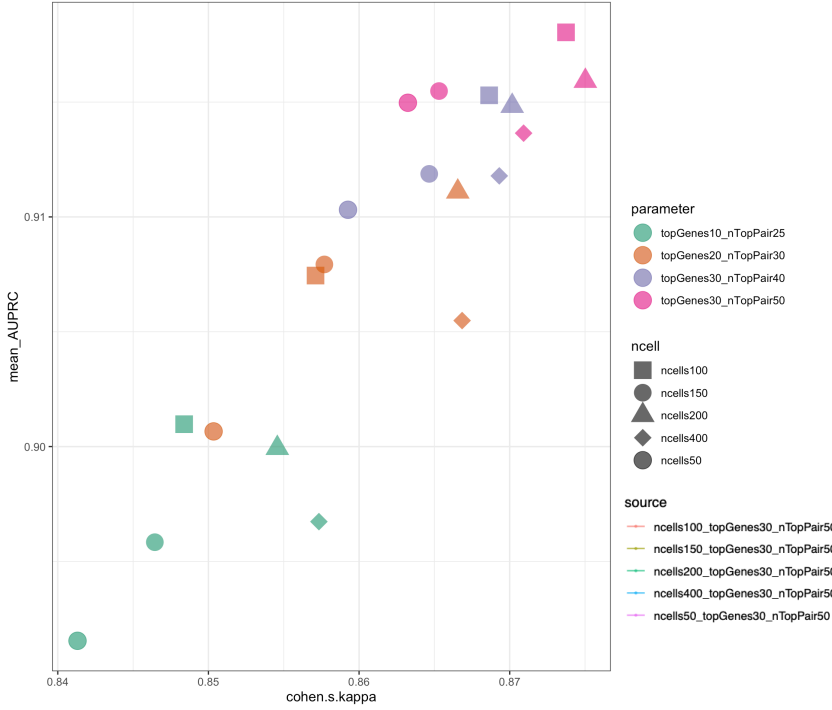

B

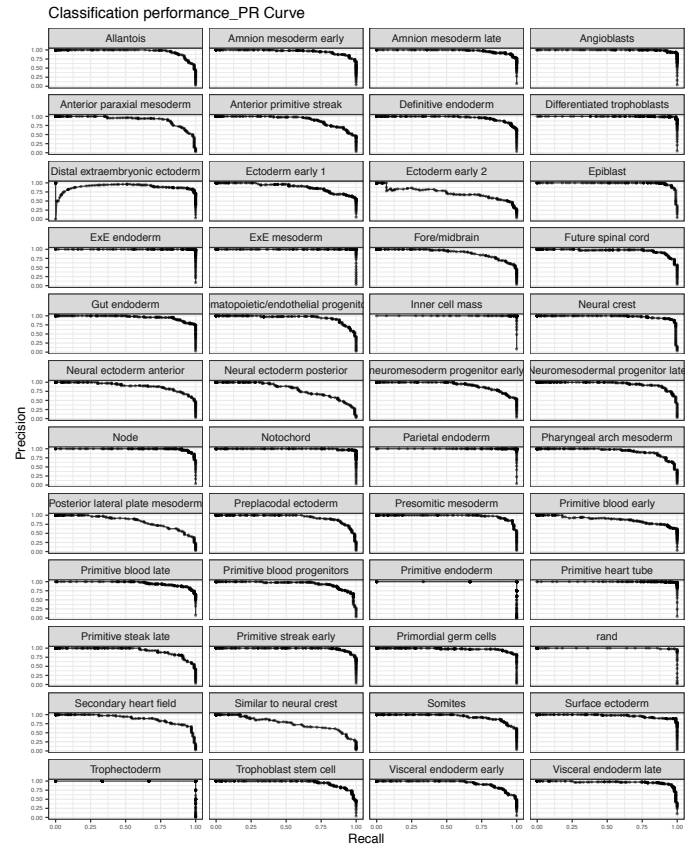

C

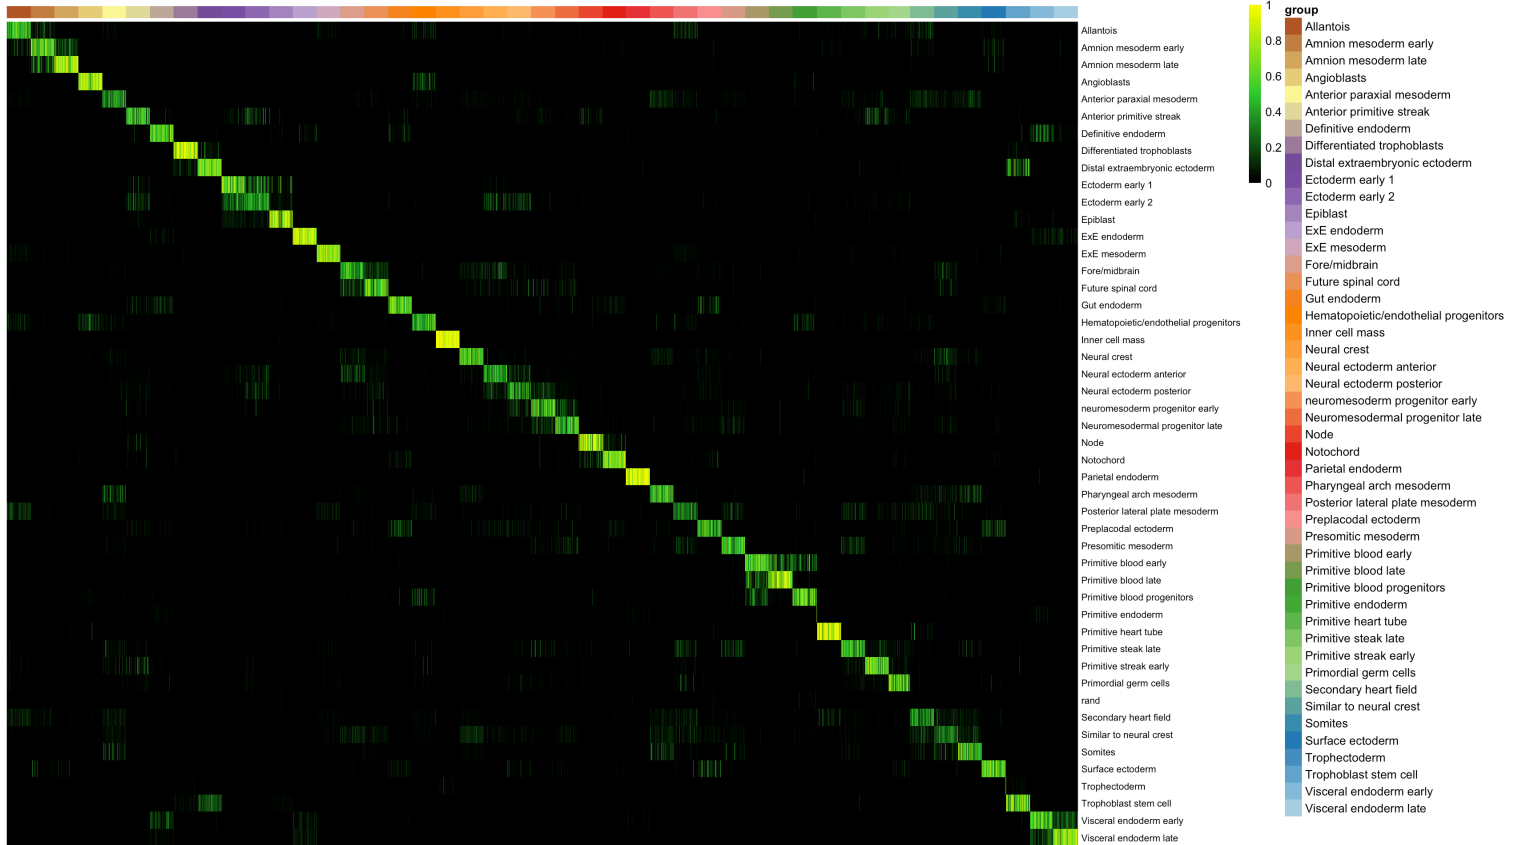

# Supplementary Figure 4

A

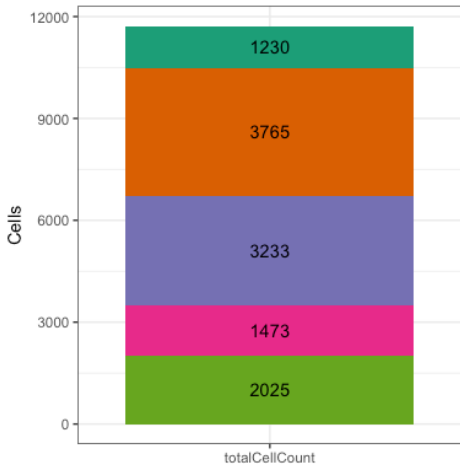

B

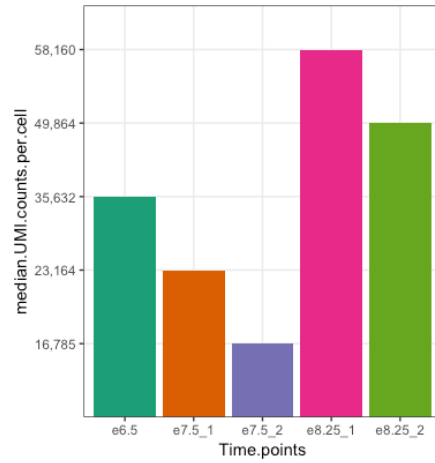

C

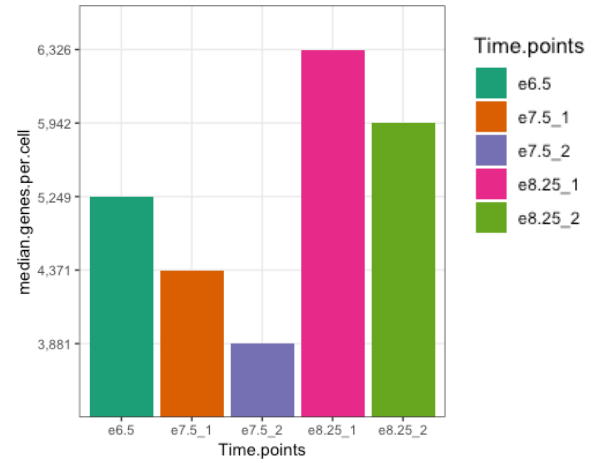

D

| Date of experiment | Time points | Emrbyos | Cells | Seq     | mean reads per cell | median genes per cell | median UMI counts per cell | Time_point |
|--------------------|-------------|---------|-------|---------|---------------------|-----------------------|----------------------------|------------|
| 8/23/18            | e6.5        | 13      | 1230  | NovaSeq | 363,452             | 5,249                 | 35,632                     | e6.5       |
| 9/6/18             | e7.5_1      | 8       | 3765  | NovaSeq | 86,103              | 4,371                 | 23,164                     | e7.5       |
| 9/6/18             | e7.5_2      | 8       | 3233  | NovaSeq | 141,595             | 3,881                 | 16,785                     | e7.5       |
| 4/5/18             | e8.25_1     | 1       | 1473  | NovaSeq | 284,417             | 6,326                 | 58,160                     | e8.25      |
| 4/5/18             | e8.25_2     | 1       | 2025  | NovaSeq | 218,973             | 5,942                 | 49,864                     | e8.25      |

E

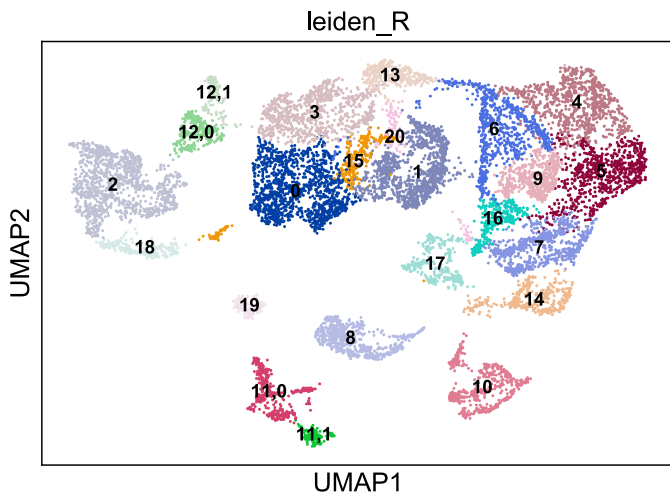

F

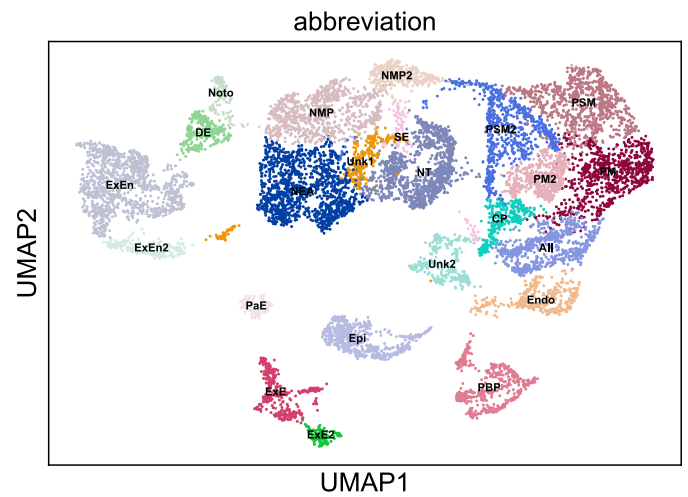

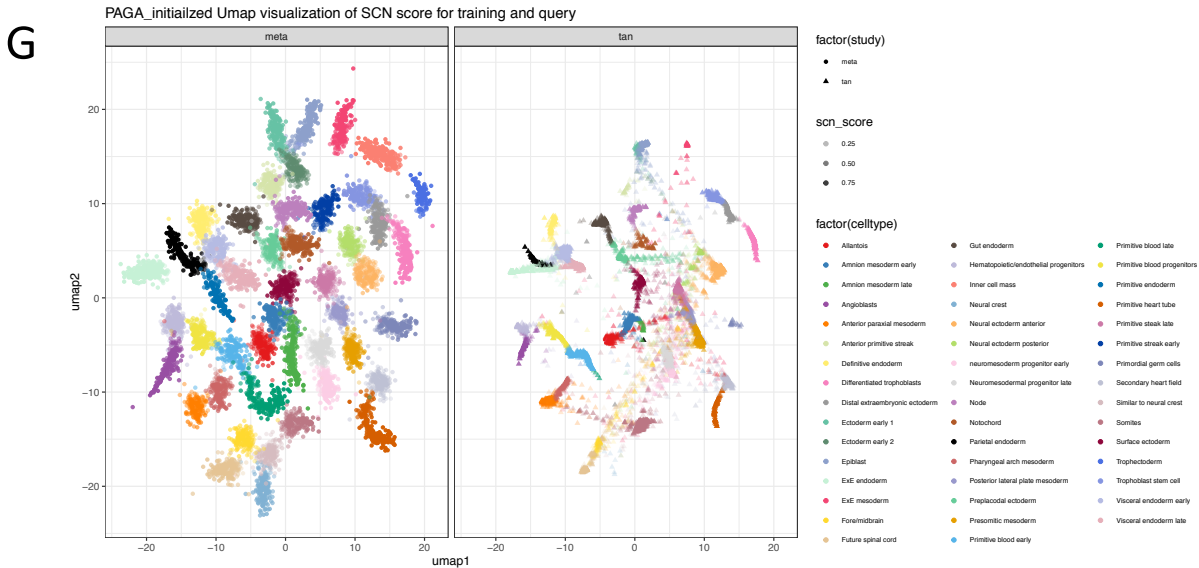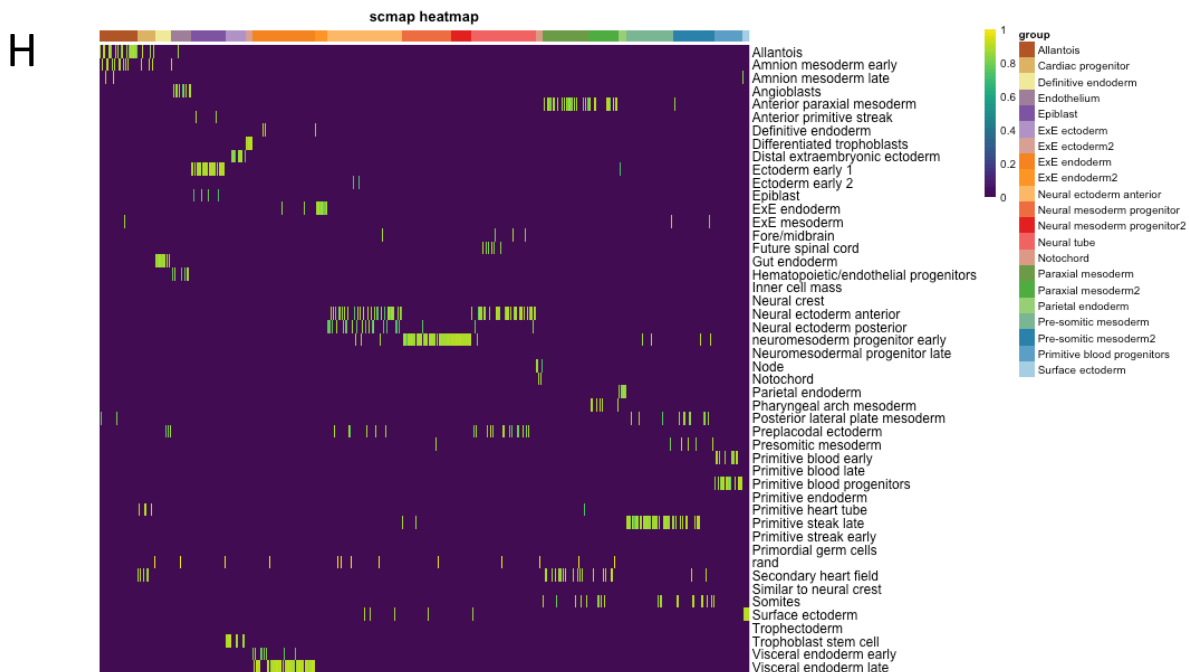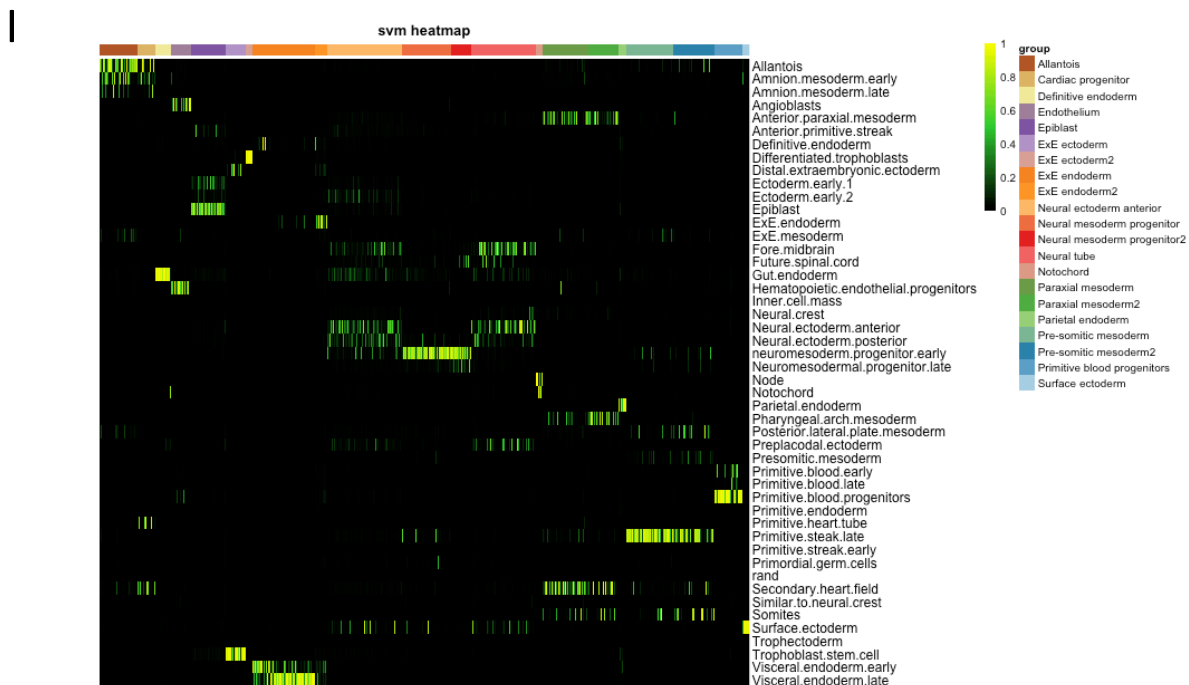

# Supplementary Figure 5

A

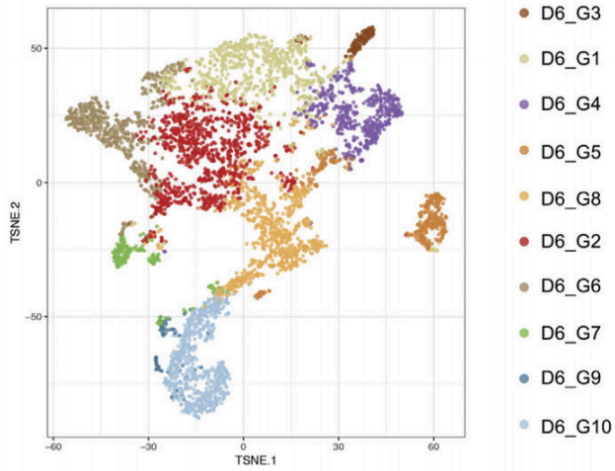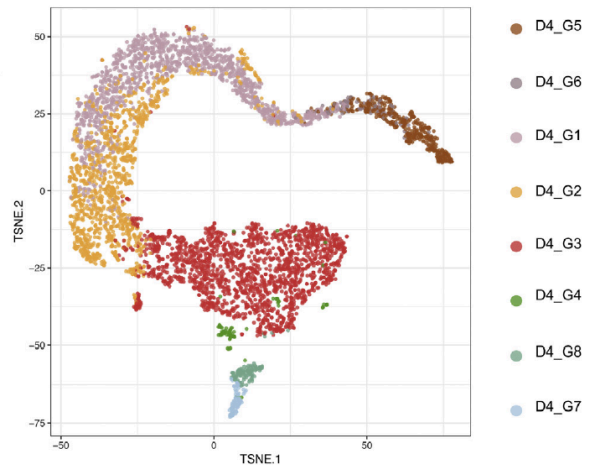

B

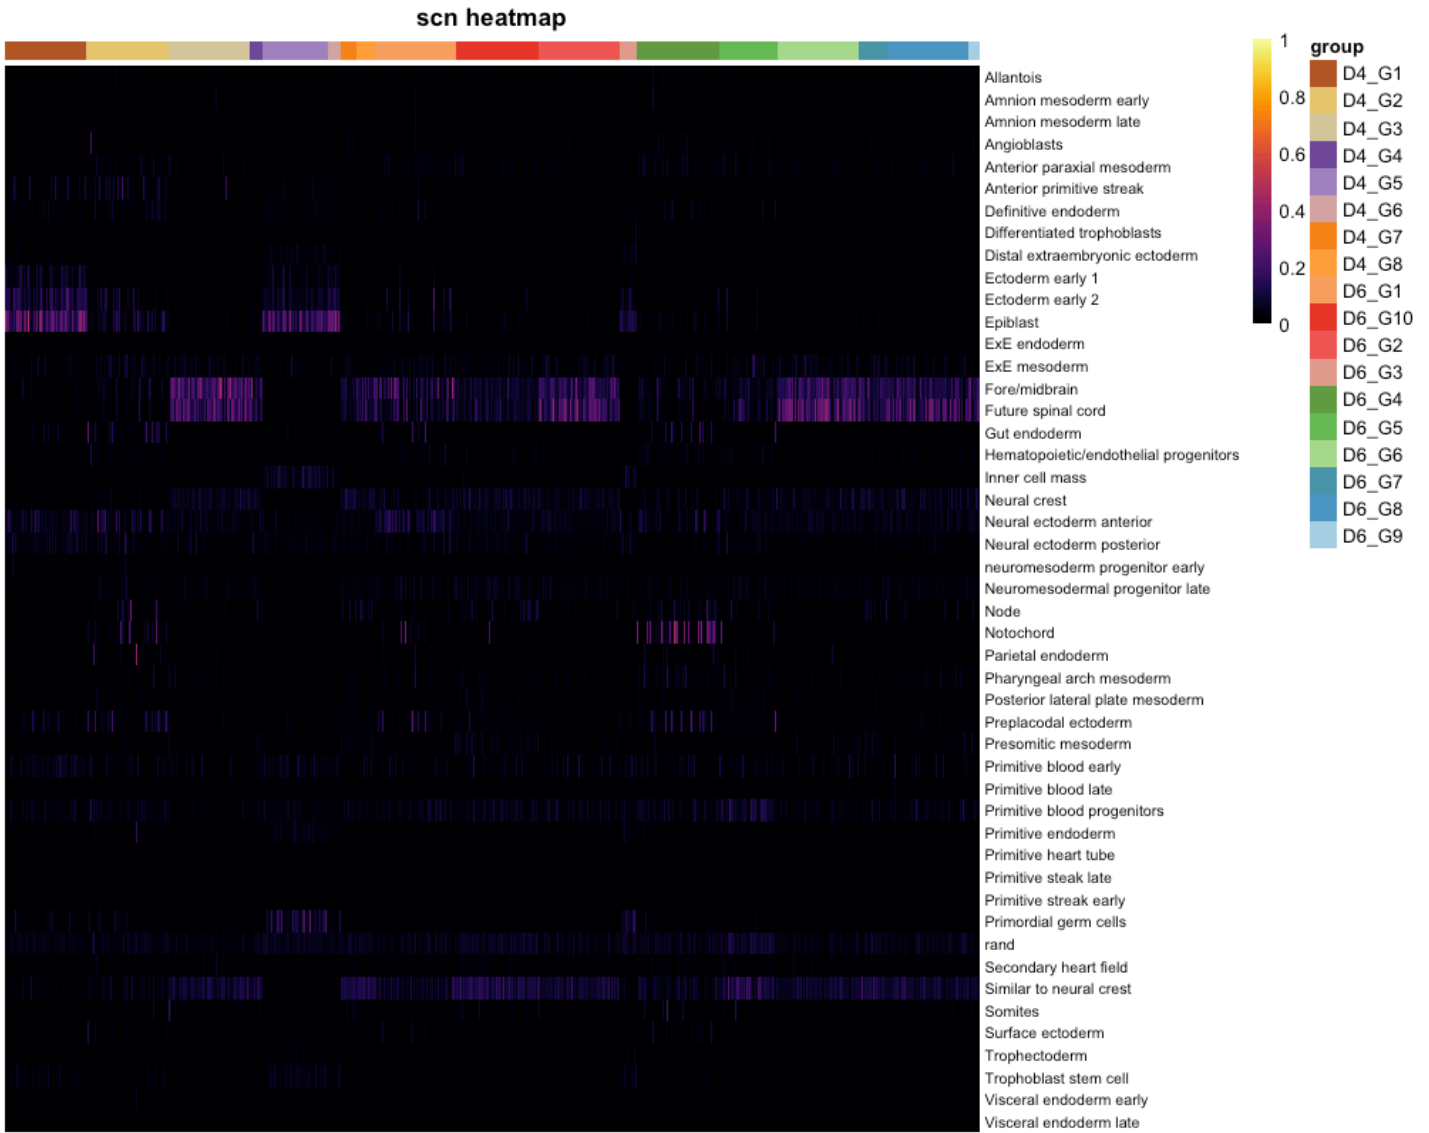

# Supplementary Figure 6

A

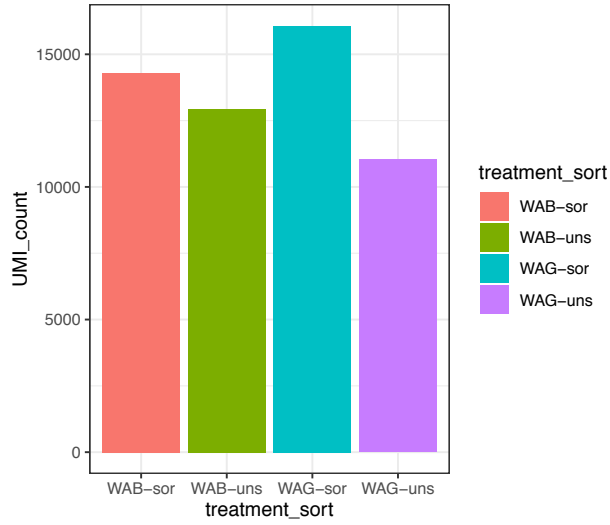

B

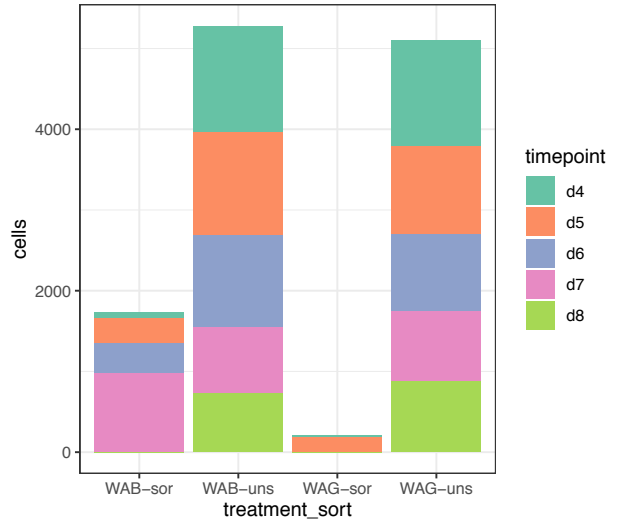

C

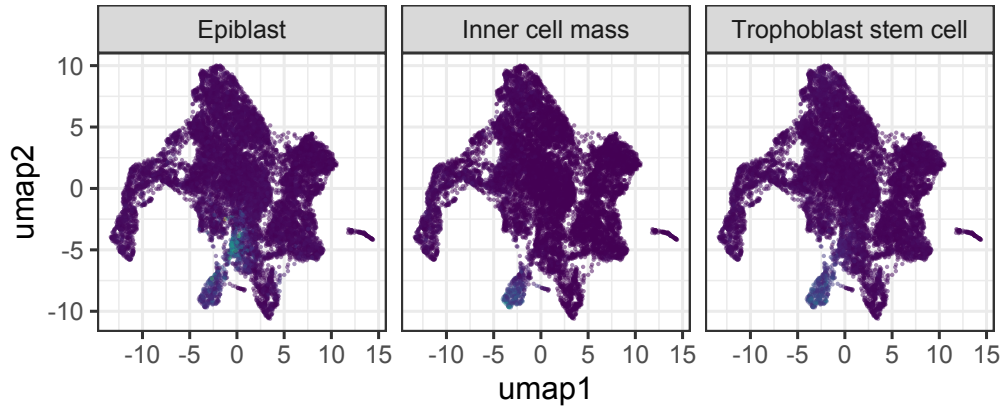

D

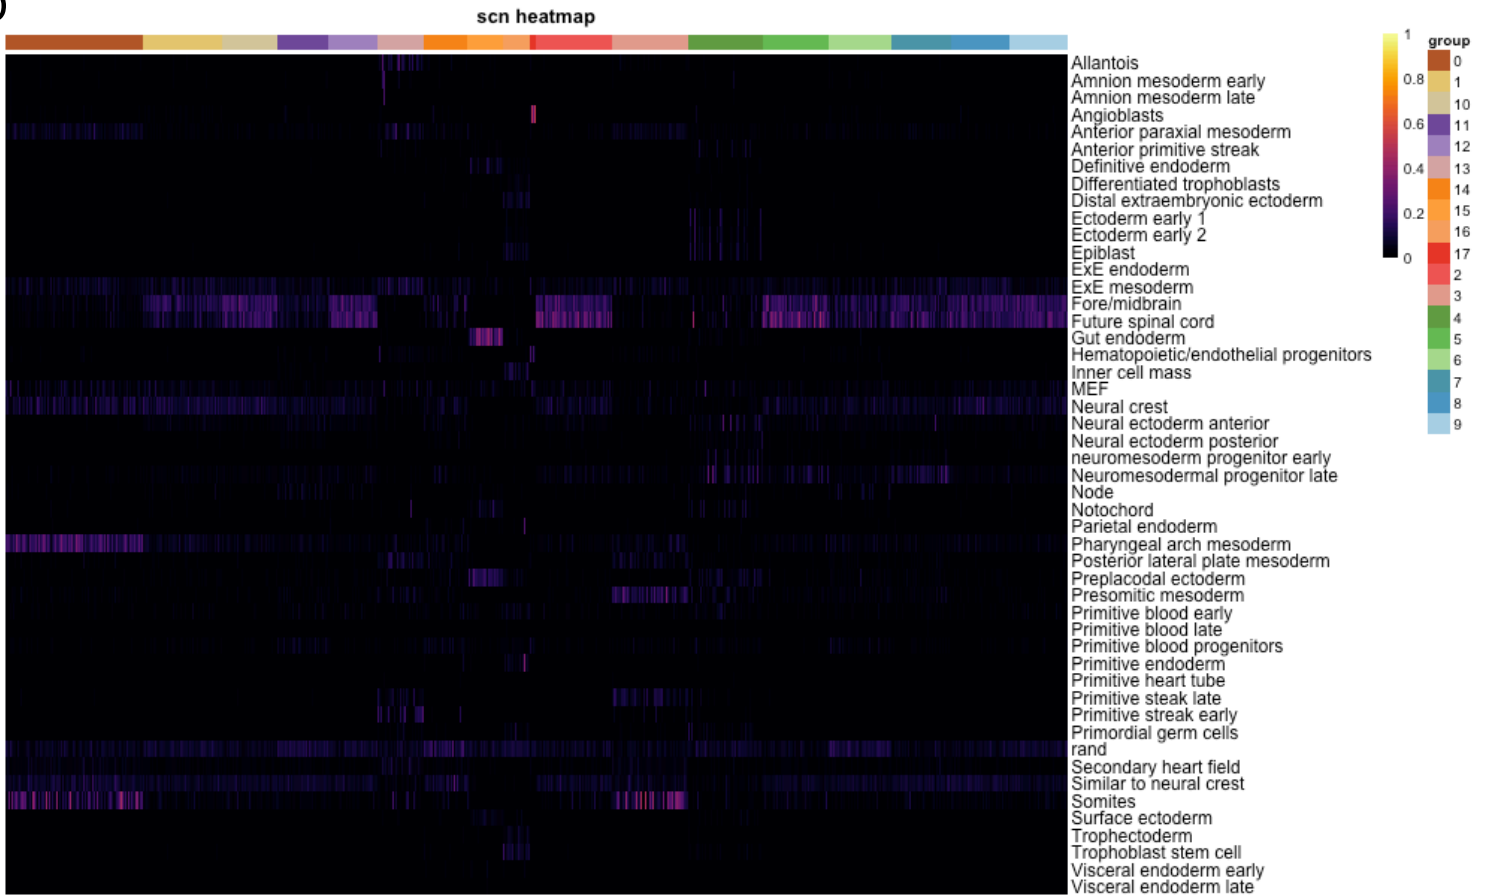



### E SCN classification for sorted WAB treated cells

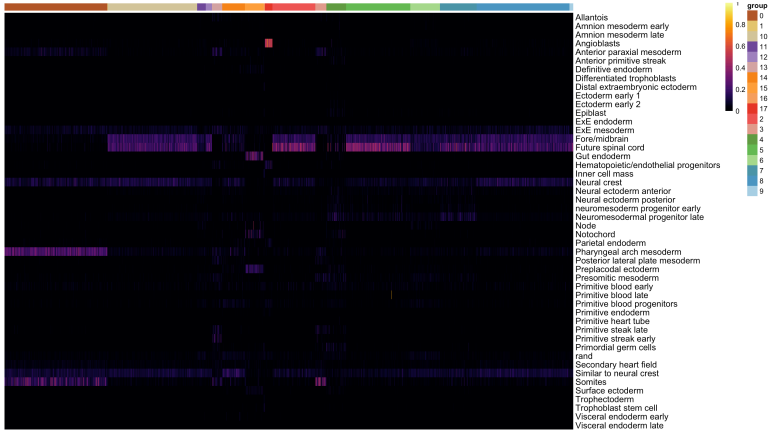

### F SCN classification for unsorted WAB treated cells

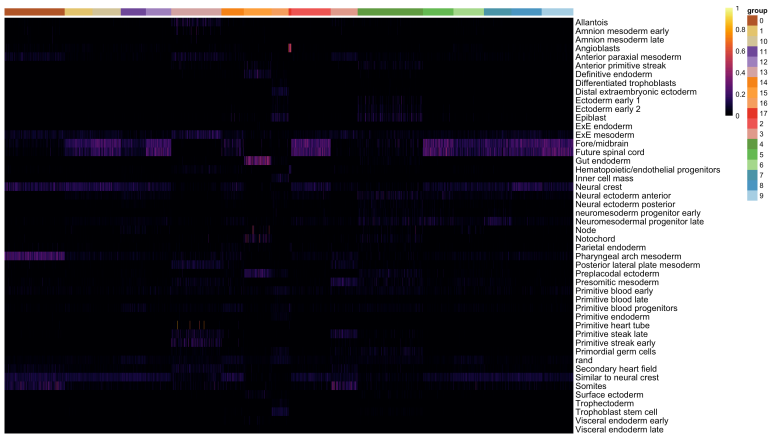

### G SCN classification for sorted WAG treated cells

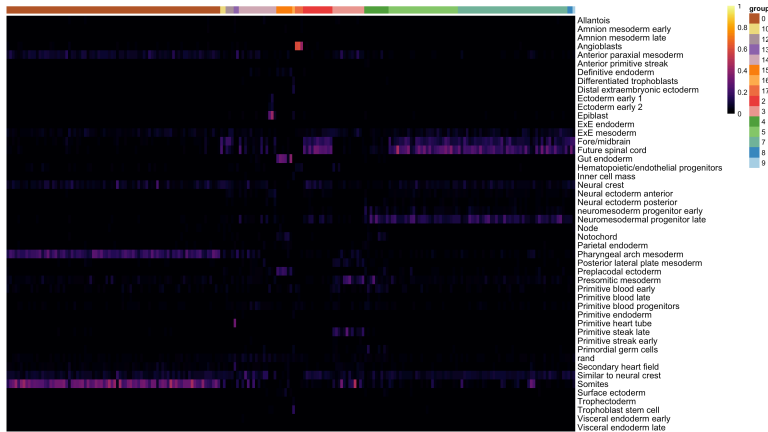

### H SCN classification for unsorted WAG treated cells

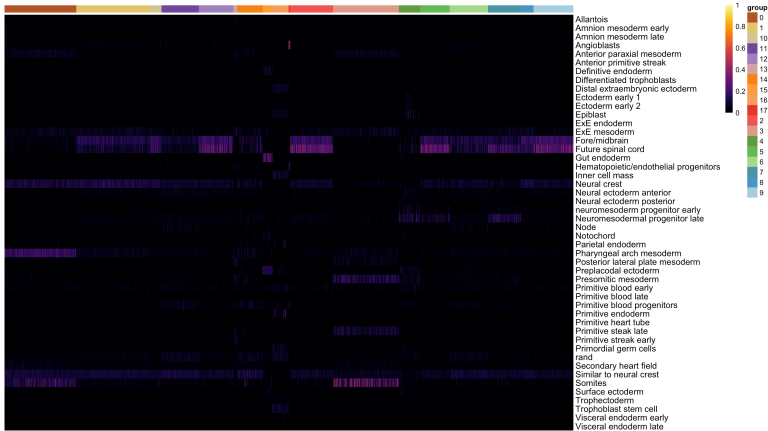

# Supplementary Figure 7

A

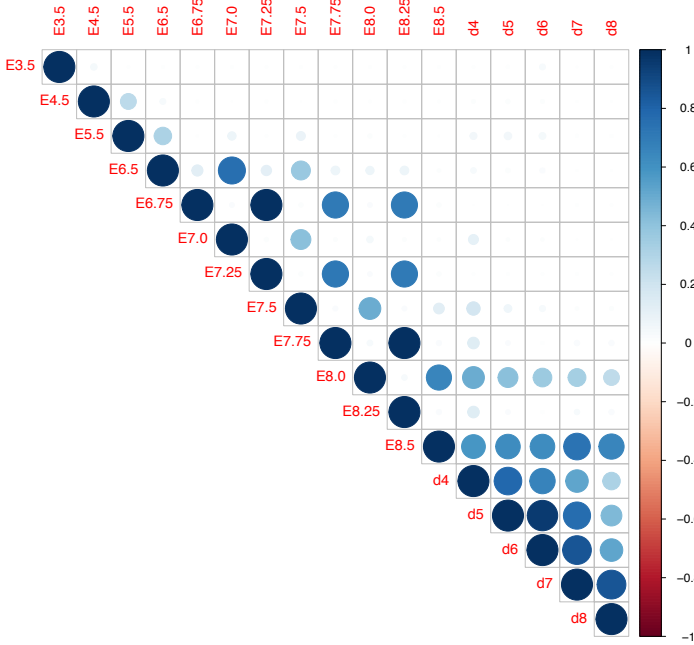

B

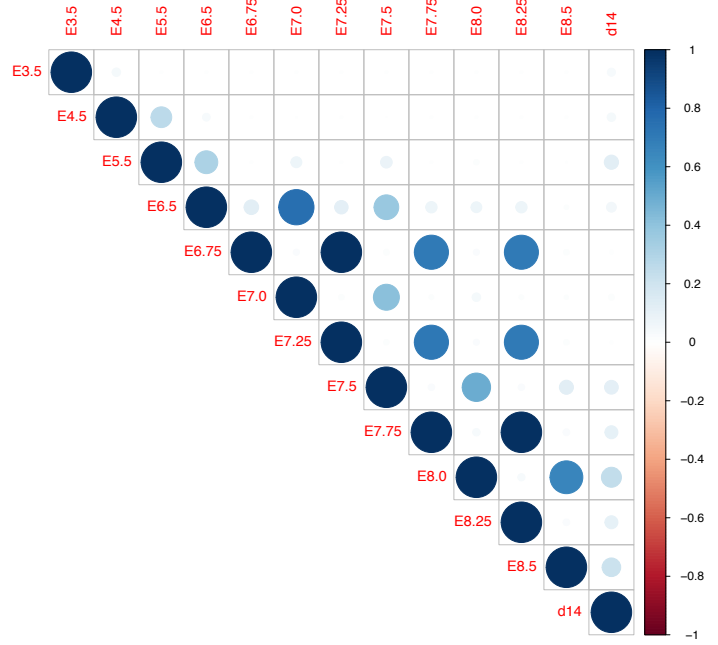

C

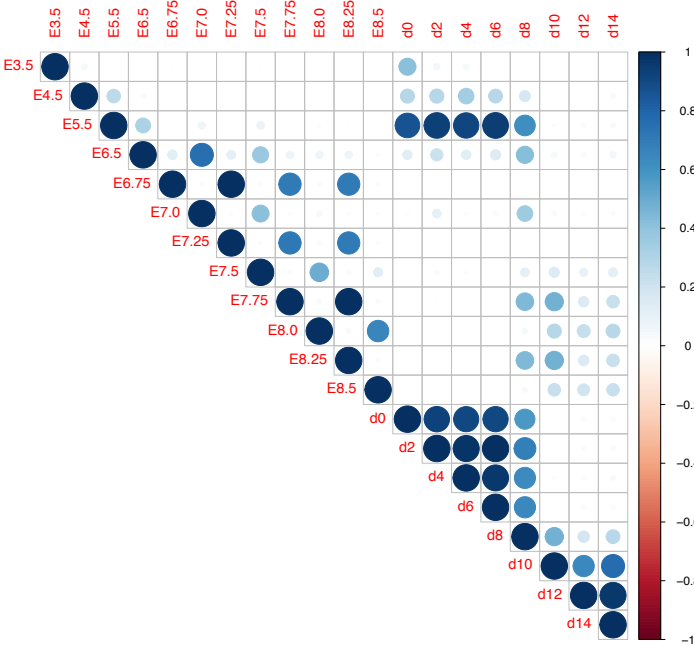

D

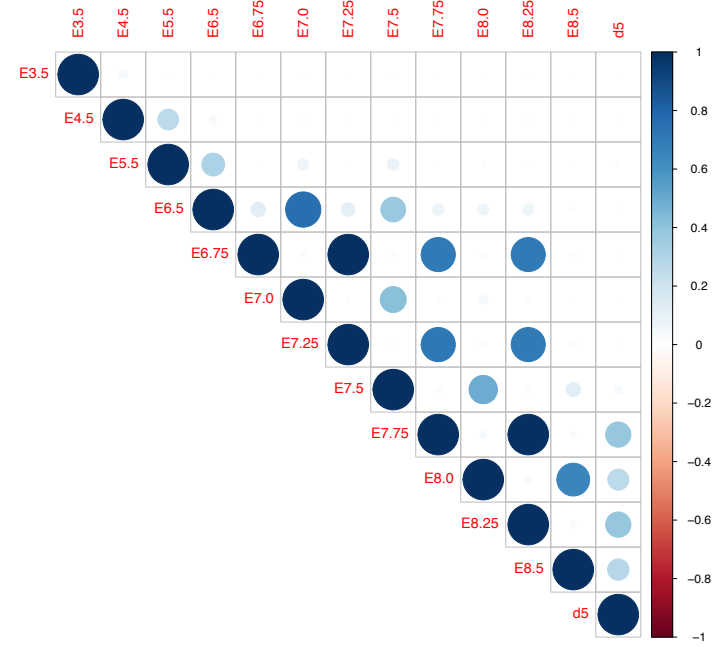

# Supplementary Figure 8

A

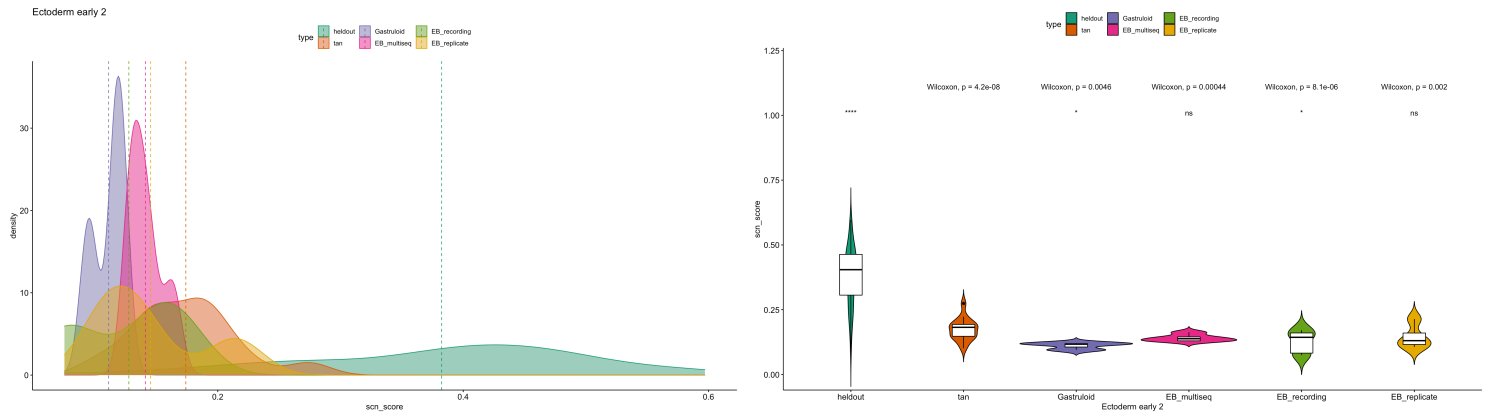

B

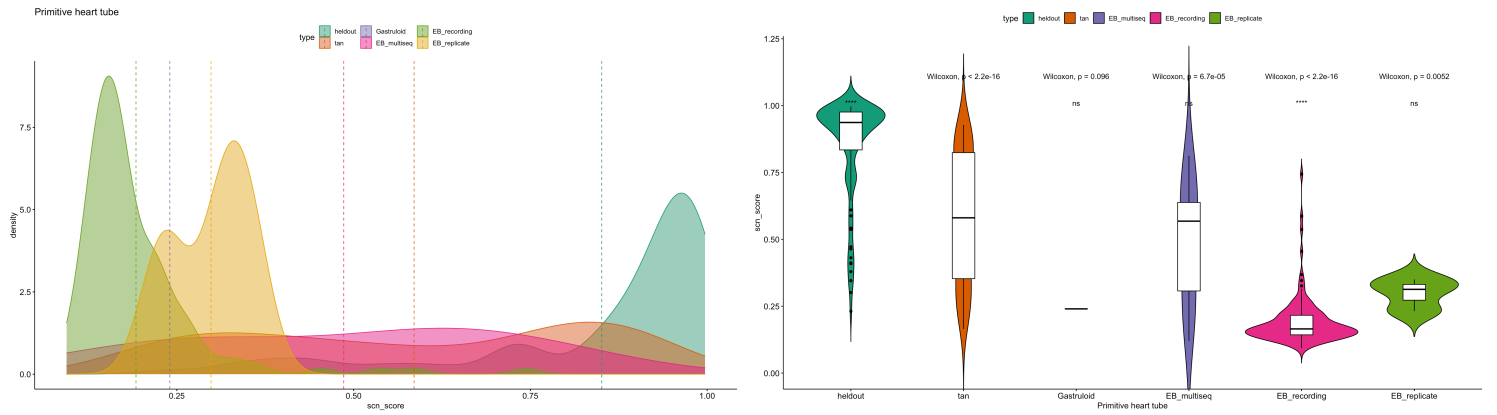

C

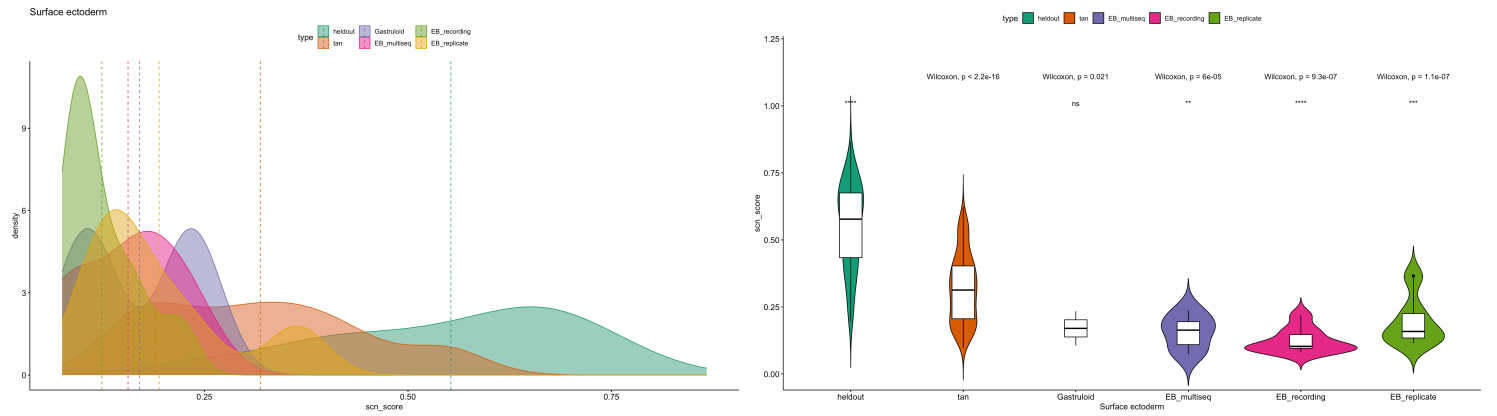

D

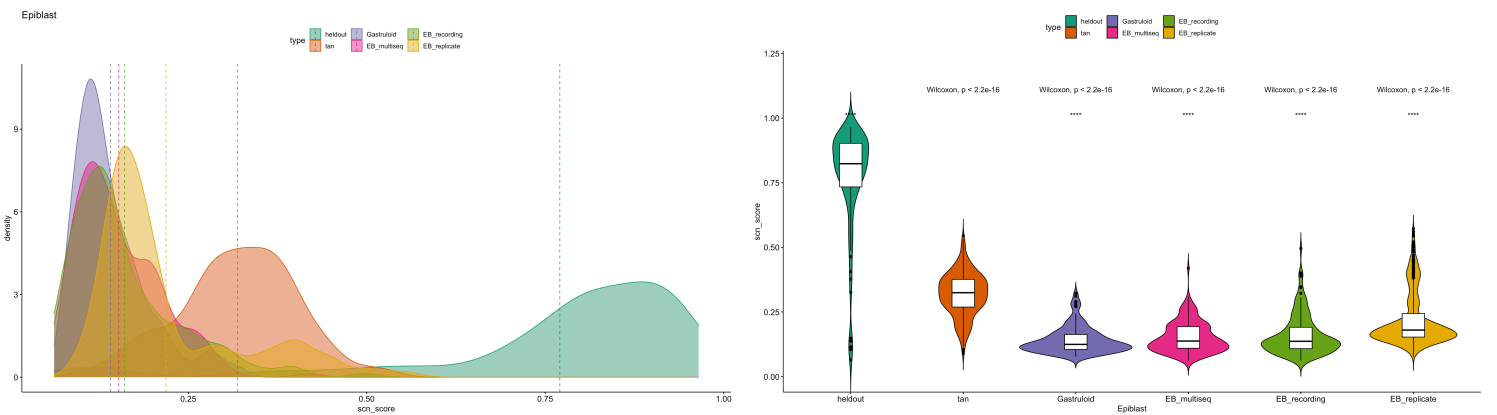

# Supplementary Figure 8

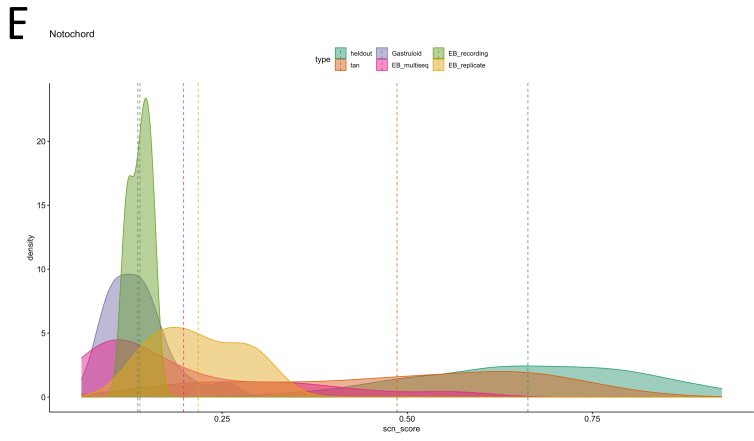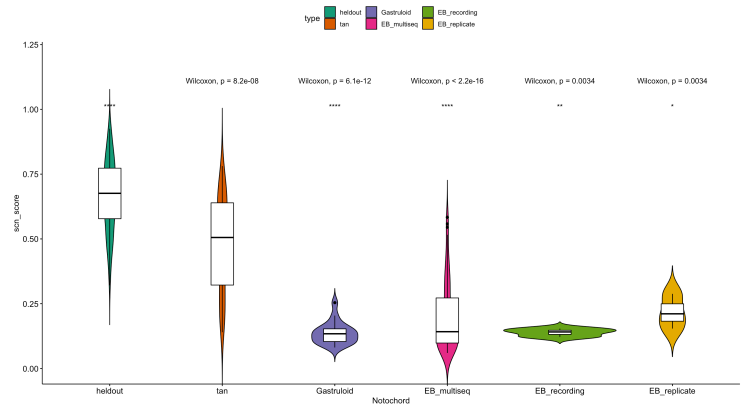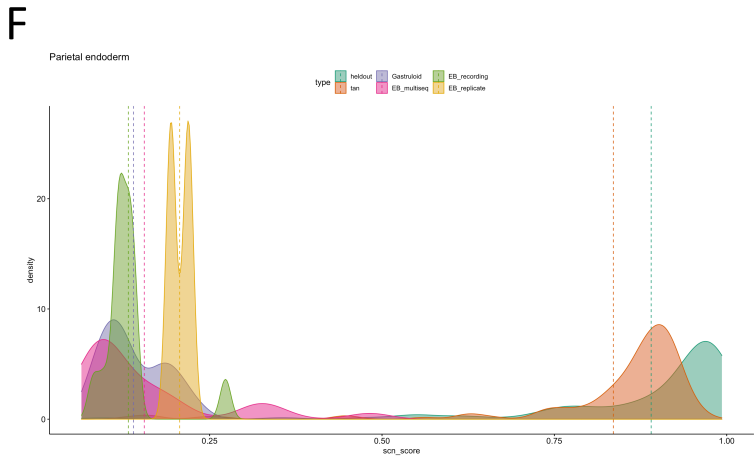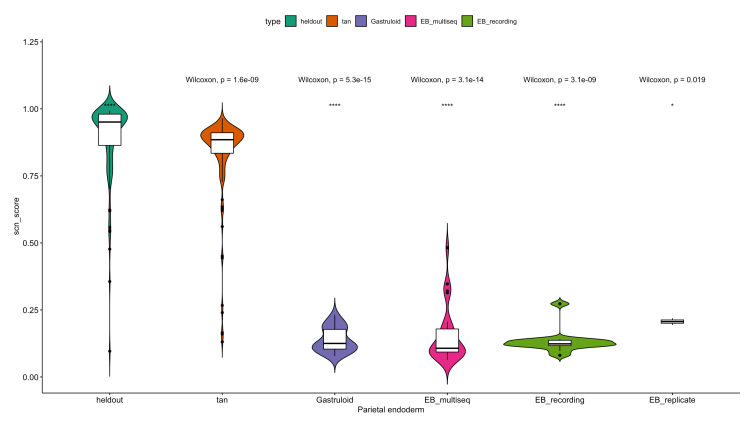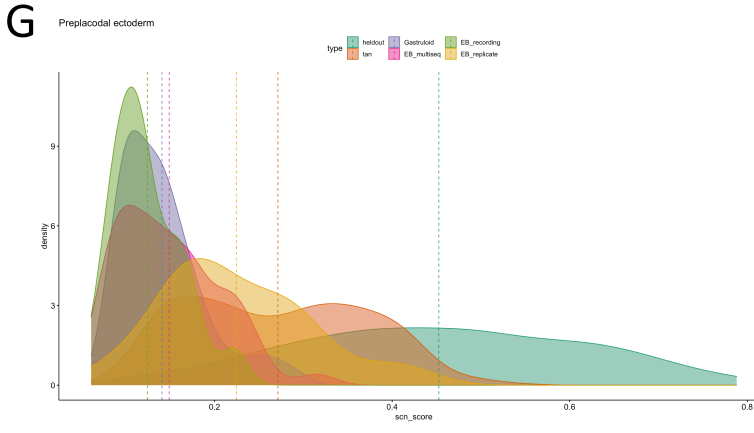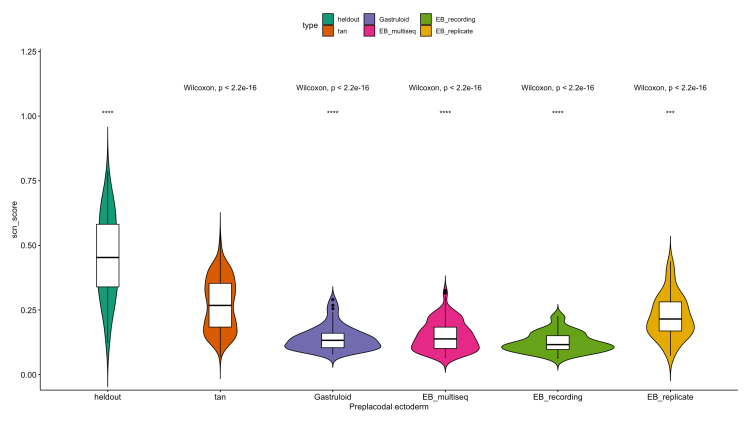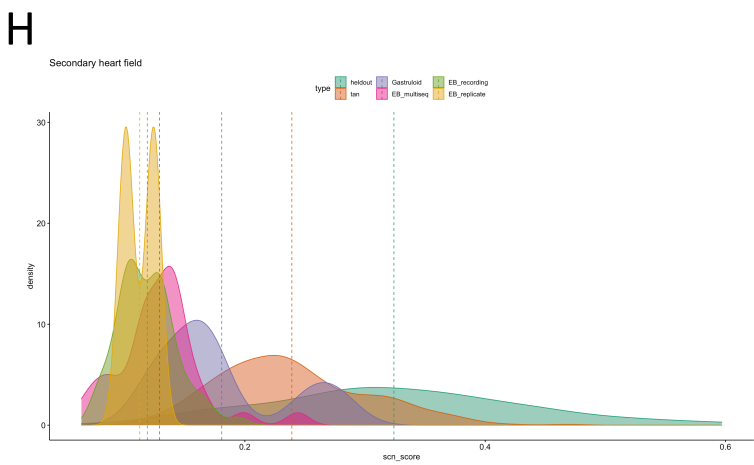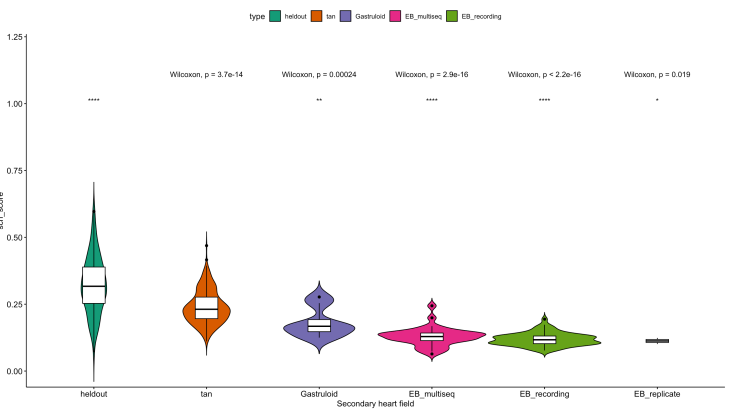

# Supplementary Figure 8

I

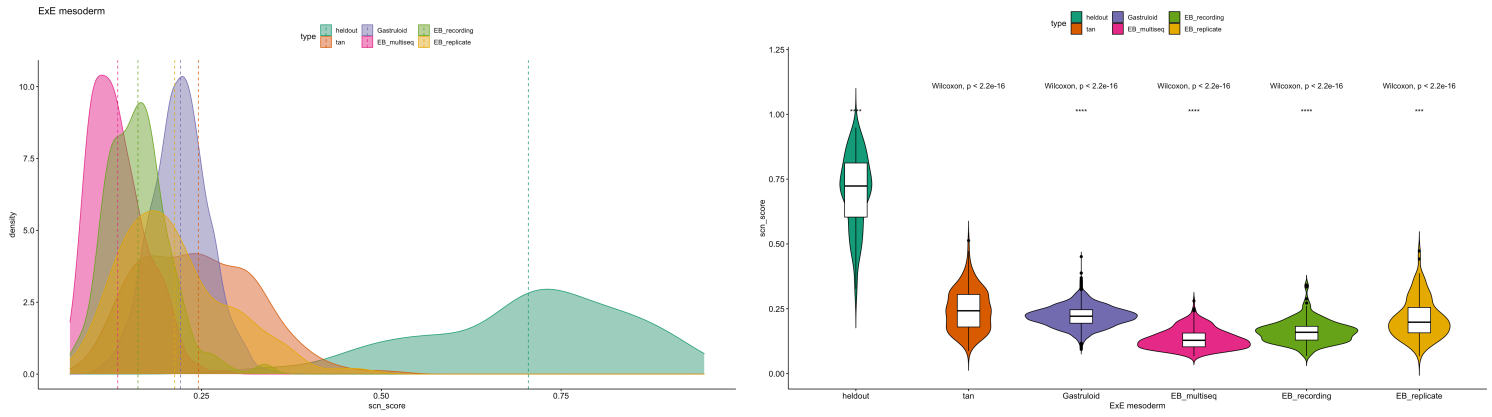

J

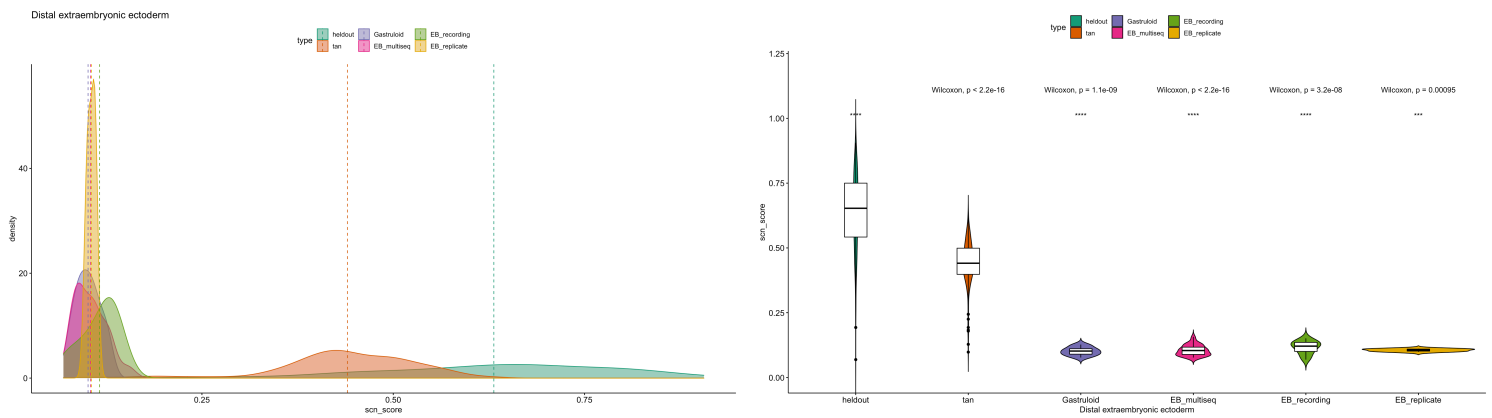

K

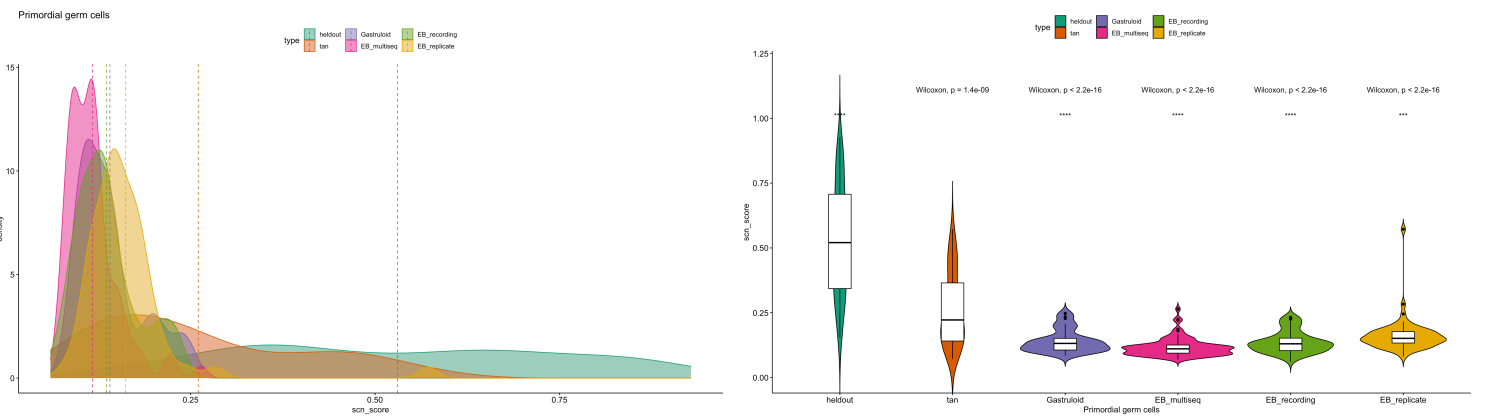

L

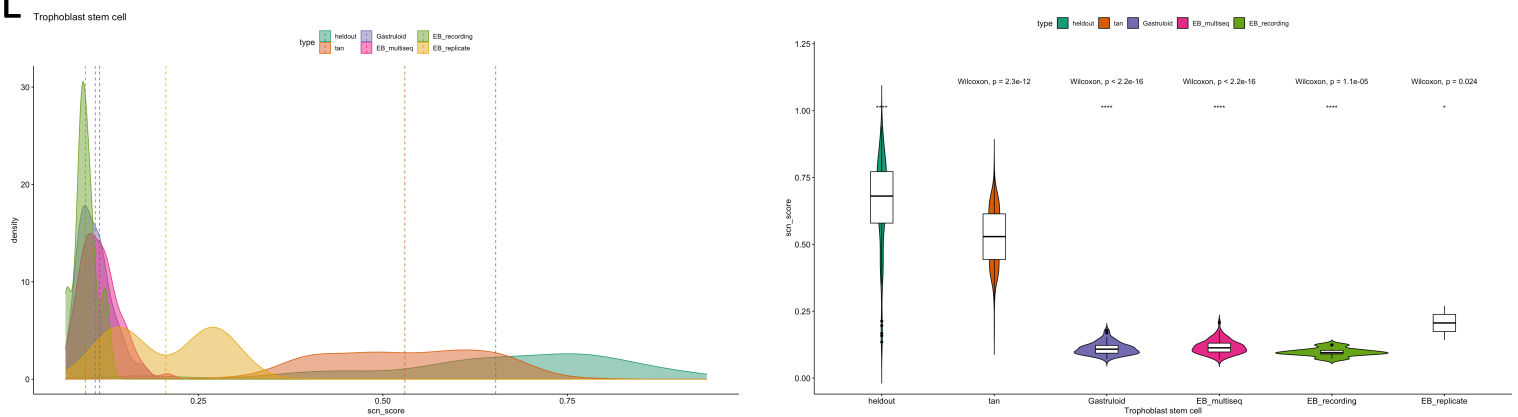

# Supplementary Figure 8

M

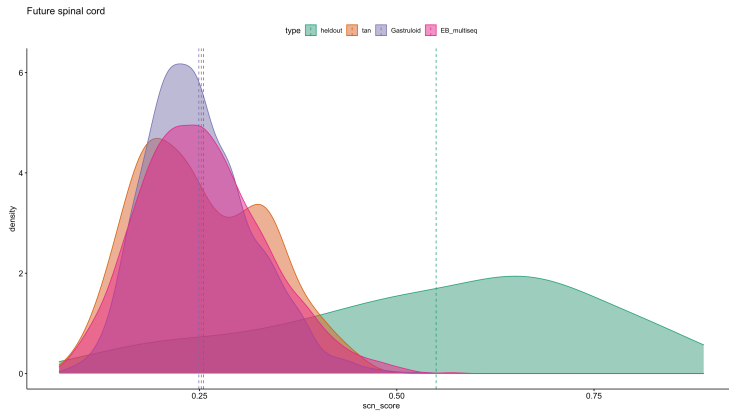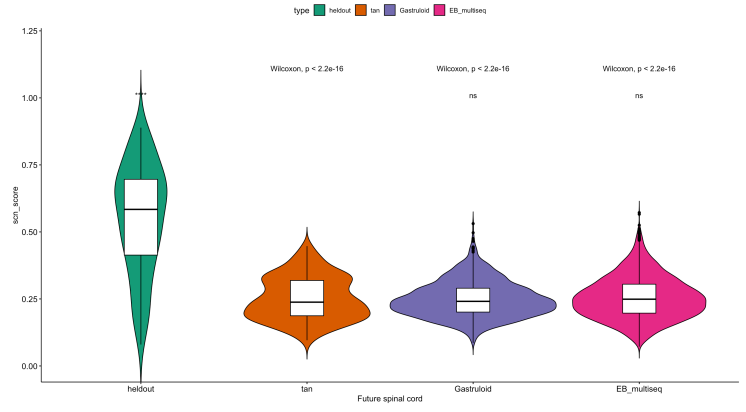

N

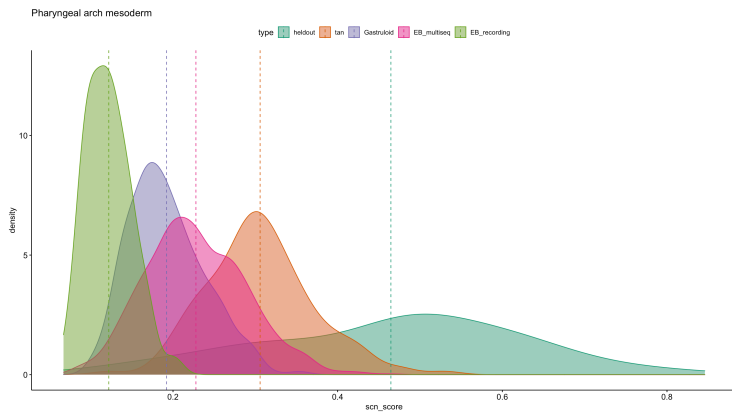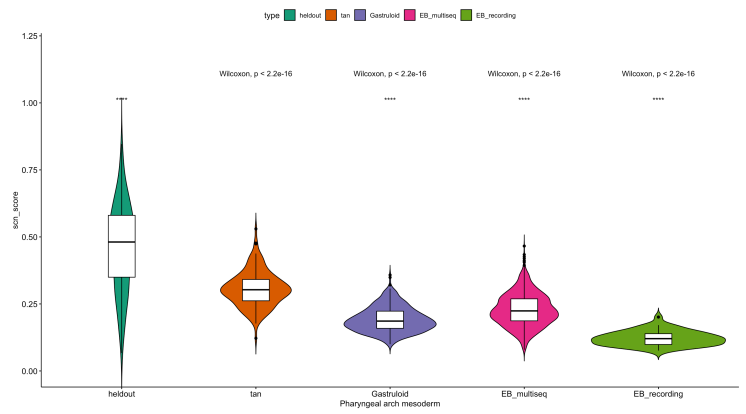

O

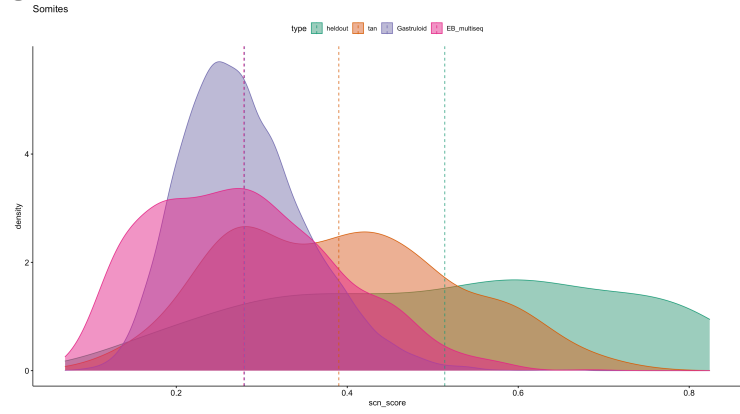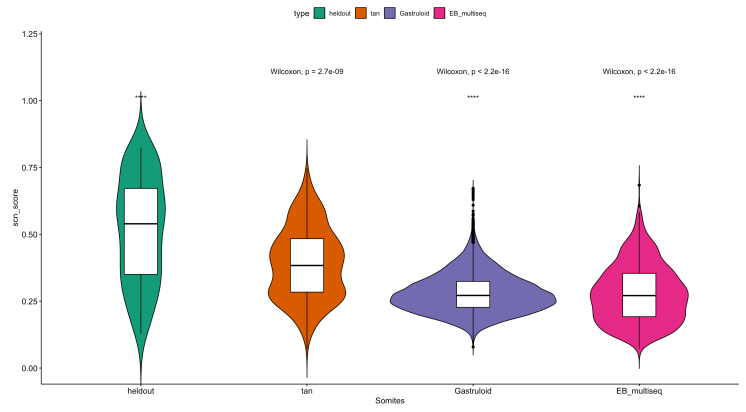

# Supplementary Figure 9

A

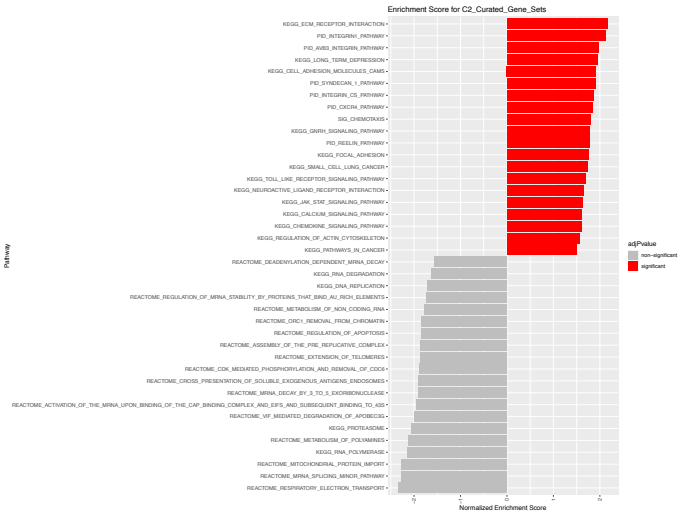

B

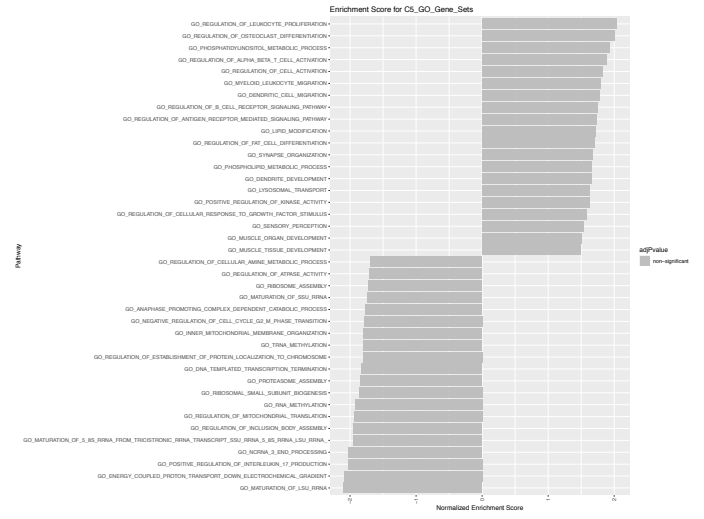

C

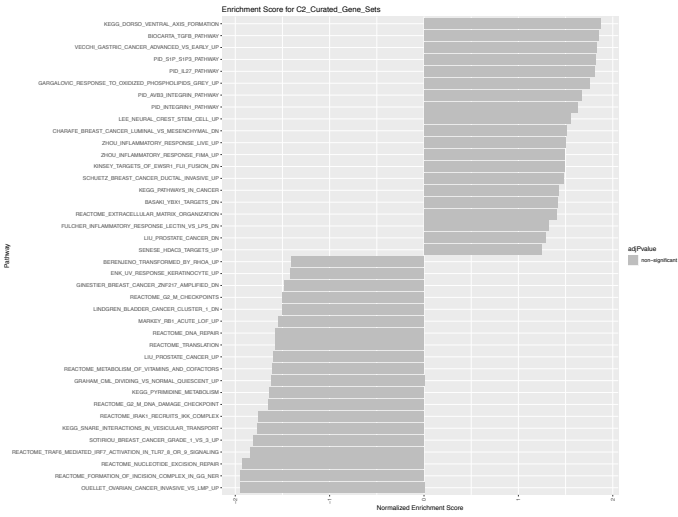

D

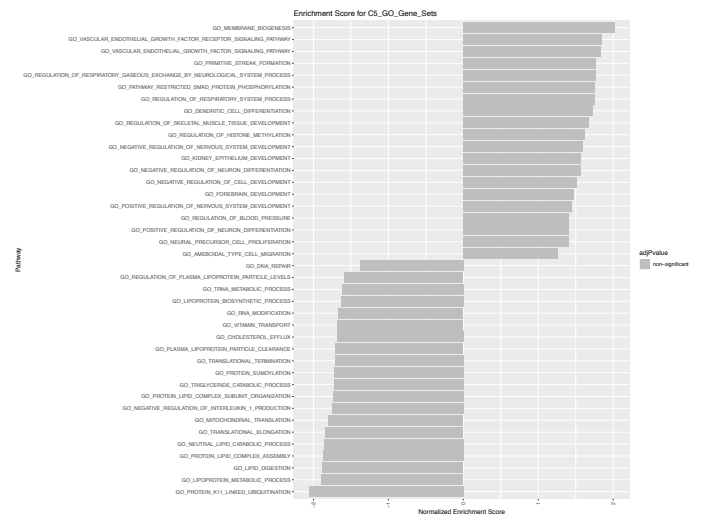

# Supplementary Figure 10

A

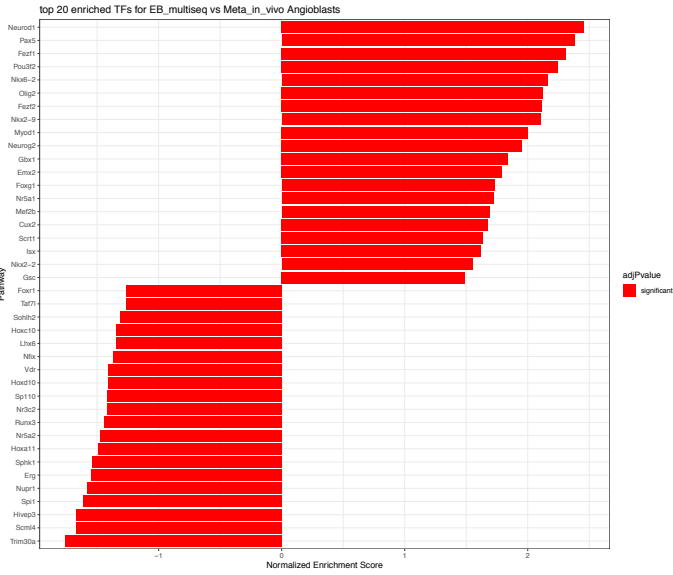

B

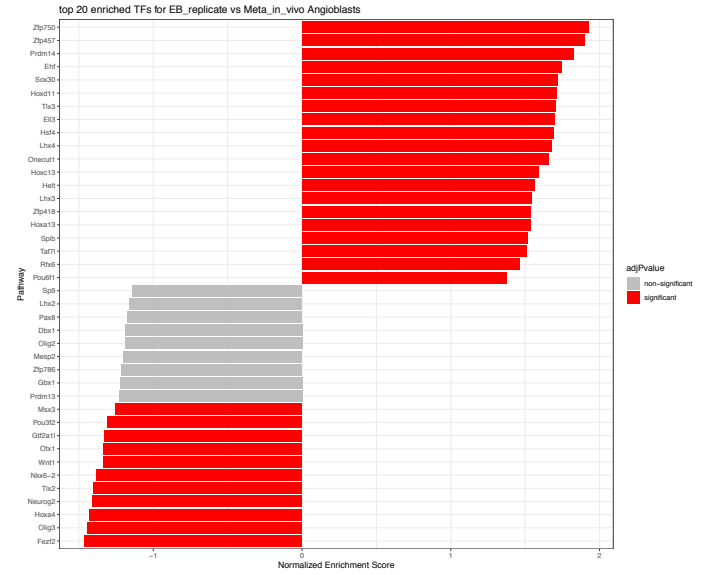

C

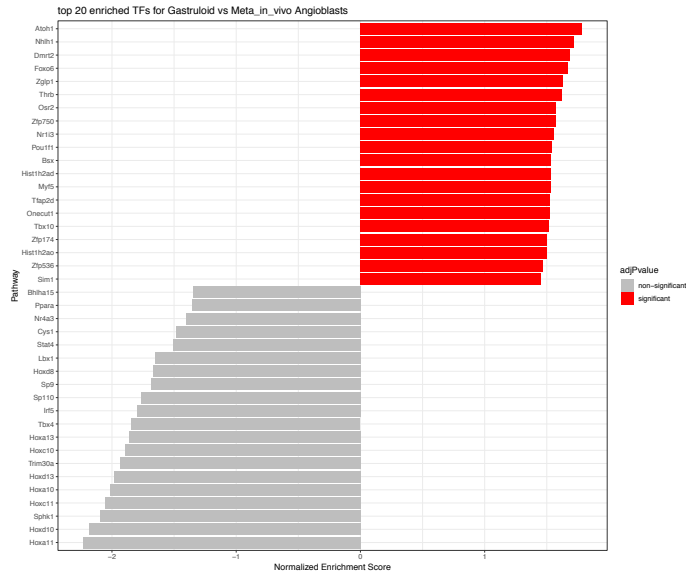

D

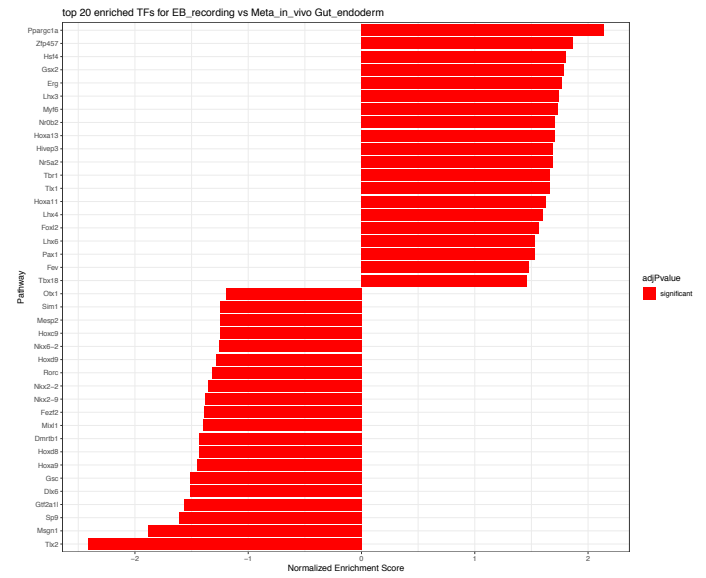

E

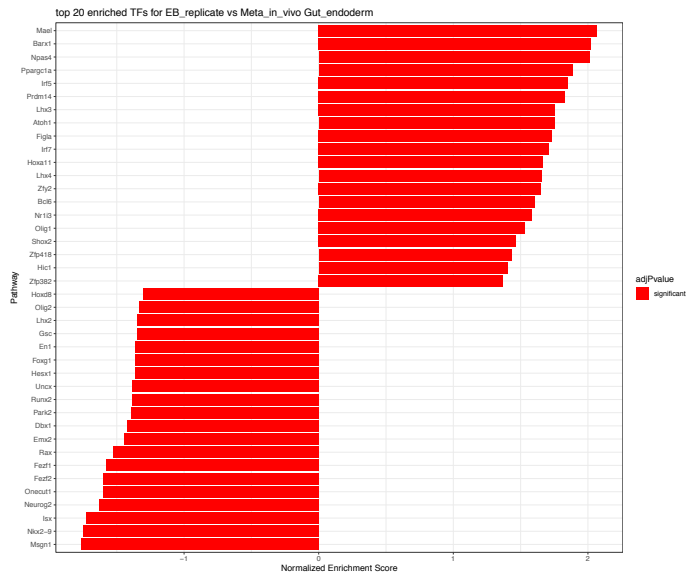

F

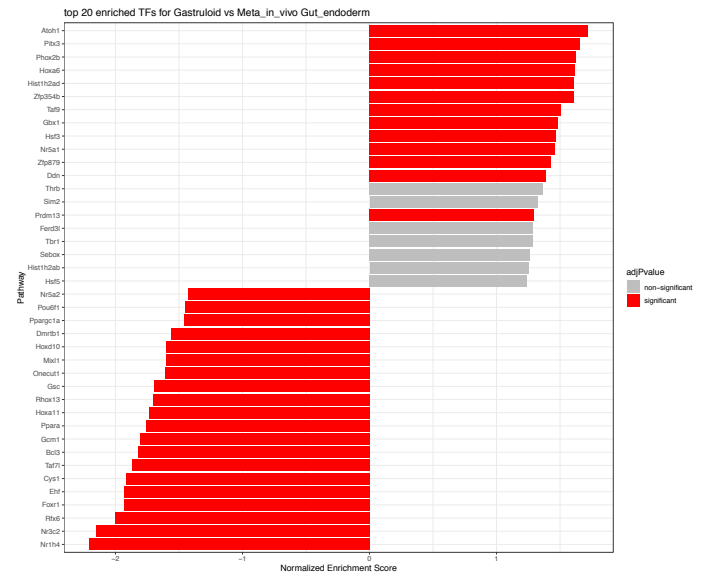

Supplement: Supplementary file [file media-1.pdf]
